# Supplementary material for: Distance Monitoring of Advanced Cancer Patients with Impaired Cardiac and Respiratory Function Assisted at Home: A Study Protocol in Italy
Source: MDPI journal article supplement (doi:10.3390/jcm12051922), 2023-02-28
Supplement: s1 [file s1]

Patient code \_\_\_\_\_

Date \_\_\_\_\_

**Patient data**

1. **Gender** ☐ Male ☐ Female

2. **Age** \_\_\_\_\_

3. **Marital status**

- ☐ Married or Living with a partner  
☐ Widower/Widow  
☐ Separated/divorced  
☐ Single

4. **Educational Qualification**

- ☐ No title  
☐ Primary school  
☐ Secondary school  
☐ High School  
☐ University degree/diploma or higher qualification

5. **Employment**

- ☐ Student  
☐ Not employed  
☐ Employed  
☐ Retired or Off work

6. **Who lives in the house with you? (one answer in each line)**

|                                           | Yes                      | No                       |
|-------------------------------------------|--------------------------|--------------------------|
| Nobody, I live alone                      | <input type="checkbox"/> | <input type="checkbox"/> |
| Partner                                   | <input type="checkbox"/> | <input type="checkbox"/> |
| Children/grandchildren up to 14 years old | <input type="checkbox"/> | <input type="checkbox"/> |
| Children/other relatives aged 15-64       | <input type="checkbox"/> | <input type="checkbox"/> |
| Other relatives aged 65 and over          | <input type="checkbox"/> | <input type="checkbox"/> |
| Carer                                     | <input type="checkbox"/> | <input type="checkbox"/> |

7. **Do you regularly use the following multimedia technologies?**

|                      | Yes                      | No                       |
|----------------------|--------------------------|--------------------------|
| Computer             | <input type="checkbox"/> | <input type="checkbox"/> |
| Smartphone or tablet | <input type="checkbox"/> | <input type="checkbox"/> |
| Video games          | <input type="checkbox"/> | <input type="checkbox"/> |

8. **Comorbidities**

|                                                                     | Yes                      | No                       |
|---------------------------------------------------------------------|--------------------------|--------------------------|
| Chronic Obstructive Pulmonary Disease                               | <input type="checkbox"/> | <input type="checkbox"/> |
| Chronic ischaemic heart disease after acute myocardial infarction   | <input type="checkbox"/> | <input type="checkbox"/> |
| Pulmonary emphysema                                                 | <input type="checkbox"/> | <input type="checkbox"/> |
| Valvulopathy                                                        | <input type="checkbox"/> | <input type="checkbox"/> |
| Systemic arterial hypertension                                      | <input type="checkbox"/> | <input type="checkbox"/> |
| Severe coronary artery disease                                      | <input type="checkbox"/> | <input type="checkbox"/> |
| Respiratory failure related to oncologic or metastatic lung disease | <input type="checkbox"/> | <input type="checkbox"/> |
| Cardiomyopathy developed after oncological treatment                | <input type="checkbox"/> | <input type="checkbox"/> |

## Health Questionnaire (EQ-5D-3L)

© 1990 EuroQol Research Foundation. EQ-5D™ is a trade mark of the EuroQol Research Foundation. UK (English) v2.1

Under each heading, please tick the ONE box that best describes your health TODAY.

|                                                                                     |                          |
|-------------------------------------------------------------------------------------|--------------------------|
| <b>MOBILITY</b>                                                                     |                          |
| I have no problems in walking about                                                 | <input type="checkbox"/> |
| I have some problems in walking about                                               | <input type="checkbox"/> |
| I am confined to bed                                                                | <input type="checkbox"/> |
| <b>SELF-CARE</b>                                                                    |                          |
| I have no problems with self-care                                                   | <input type="checkbox"/> |
| I have some problems washing or dressing myself                                     | <input type="checkbox"/> |
| I am unable to wash or dress myself                                                 | <input type="checkbox"/> |
| <b>USUAL ACTIVITIES</b> (e.g. work, study, housework, family or leisure activities) |                          |
| I have no problems with performing my usual activities.                             | <input type="checkbox"/> |
| I have some problems with performing my usual activities                            | <input type="checkbox"/> |
| I am unable to perform my usual activities                                          | <input type="checkbox"/> |
| <b>PAIN/ DISCOMFORT</b>                                                             |                          |
| I have no pain or discomfort                                                        | <input type="checkbox"/> |
| I have moderate pain or discomfort                                                  | <input type="checkbox"/> |
| I have extreme pain or discomfort                                                   | <input type="checkbox"/> |
| <b>ANXIETY/ DEPRESSION</b>                                                          |                          |
| I am not anxious or depressed                                                       | <input type="checkbox"/> |
| I am moderately anxious or depressed.                                               | <input type="checkbox"/> |
| I am extremely anxious or depressed                                                 | <input type="checkbox"/> |

The best health  
you can imagine

We would like to know how good or bad your health is TODAY.

- This scale is numbered from 0 to 100.
- 100 means the best health you can imagine.  
0 means the worst health you can imagine.
- Please mark an X on the scale to indicate how your health is TODAY.
- Now, write the number you marked on the scale in the box below.

YOUR HEALTH TODAY =

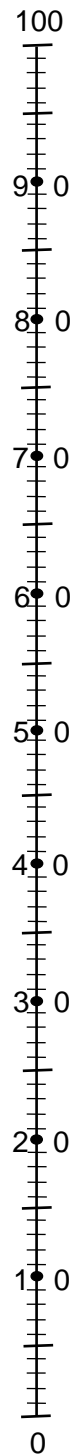

The worst health  
you can imagine

## DASS – 21

Lovibond, S.H. & Lovibond, P.F. (1995). Manual for the Depression Anxiety & Stress Scales.  
(2nd Ed.)Sydney: Psychology Foundation

Please read each statement and circle a number 0, 1, 2 or 3 which indicates how much the statement applied to you over the past week. There are no right or wrong answers. Do not spend too much time on any statement.

The rating scale is as follows:

| 0                          | 1                                                 | 2                                                             | 3                                           |
|----------------------------|---------------------------------------------------|---------------------------------------------------------------|---------------------------------------------|
| Did not apply to me at all | Applied to me to some degree, or some of the time | Applied to me to a considerable degree or a good part of time | Applied to me very much or most of the time |

|    |                                                                                                                                     |   |   |   |   |
|----|-------------------------------------------------------------------------------------------------------------------------------------|---|---|---|---|
| 1  | I found it hard to wind down                                                                                                        | 0 | 1 | 2 | 3 |
| 2  | I was aware of dryness of my mouth                                                                                                  | 0 | 1 | 2 | 3 |
| 3  | I couldn't seem to experience any positive feeling at all                                                                           | 0 | 1 | 2 | 3 |
| 4  | I experienced breathing difficulty (e.g. excessively rapid breathing, breathlessness in the absence of physical exertion)           | 0 | 1 | 2 | 3 |
| 5  | I found it difficult to work up the initiative to do things                                                                         | 0 | 1 | 2 | 3 |
| 6  | I tended to over-react to situations                                                                                                | 0 | 1 | 2 | 3 |
| 7  | I experienced trembling (e.g. in the hands)                                                                                         | 0 | 1 | 2 | 3 |
| 8  | I felt that I was using a lot of nervous energy                                                                                     | 0 | 1 | 2 | 3 |
| 9  | I was worried about situations in which I might panic and make a fool of myself                                                     | 0 | 1 | 2 | 3 |
| 10 | I felt that I had nothing to look forward to                                                                                        | 0 | 1 | 2 | 3 |
| 11 | I found myself getting agitated                                                                                                     | 0 | 1 | 2 | 3 |
| 12 | I found it difficult to relax                                                                                                       | 0 | 1 | 2 | 3 |
| 13 | I felt down-hearted and blue                                                                                                        | 0 | 1 | 2 | 3 |
| 14 | I was intolerant of anything that kept me from getting on with what I was doing                                                     | 0 | 1 | 2 | 3 |
| 15 | I felt I was close to panic                                                                                                         | 0 | 1 | 2 | 3 |
| 16 | I was unable to become enthusiastic about anything                                                                                  | 0 | 1 | 2 | 3 |
| 17 | I felt I wasn't worth much as a person                                                                                              | 0 | 1 | 2 | 3 |
| 18 | I felt that I was rather touchy                                                                                                     | 0 | 1 | 2 | 3 |
| 19 | I was aware of the action of my heart in the absence of physical exertion (e.g. sense of heart rate increase, heart missing a beat) | 0 | 1 | 2 | 3 |
| 20 | I felt scared without any good reason                                                                                               | 0 | 1 | 2 | 3 |
| 21 | I felt that life was meaningless                                                                                                    | 0 | 1 | 2 | 3 |

**Caregiver data**

**9. Gender** ☐ Male ☐ Female

**10. Age** \_\_\_\_\_

**11. Marital status**

- ☐ Married or Living with a partner
- ☐ Widower/Widow
- ☐ Separated/Divorced
- ☐ Single

**12. Educational qualification**

- ☐ No title
- ☐ Primary school
- ☐ Secondary school
- ☐ High School
- ☐ University degree/diploma or higher qualification

**13. Employment**

- ☐ Student
- ☐ Not employed
- ☐ Employed
- ☐ Retired or Off work

**14. What is your relationship with the patient?**

- ☐ Partner
- ☐ Daughter/Son
- ☐ Parent
- ☐ Other, specify \_\_\_\_\_

### CAREGIVER BURDEN INVENTORY (CBI)

Novak, M., & Guest, C. (1989). Application of a multidimensional caregiver burden inventory.  
*The gerontologist*, 29(6), 798-803

The questions refer to you providing care for your relative who is suffering from illness;  
Choose the number that best represents how often the statement describes your feelings.

0 = not at all      1 = a little      2 = moderately      3 = much      4 = very much

| Items |    | Score                                                              |   |   |   |     |
|-------|----|--------------------------------------------------------------------|---|---|---|-----|
| T     | 1  | My care receiver needs my help to perform many daily tasks.        | 0 | 1 | 2 | 3 4 |
| T     | 2  | My care receiver is dependent on me                                | 0 | 1 | 2 | 3 4 |
| T     | 3  | I have to watch my care receiver constantly                        | 0 | 1 | 2 | 3 4 |
| T     | 4  | I have to help my care receiver with many basic functions          | 0 | 1 | 2 | 3 4 |
| T     | 5  | I don't have a minute's break from my caregiving chores            | 0 | 1 | 2 | 3 4 |
| S     | 6  | I feel that I'm missing out on life.                               | 0 | 1 | 2 | 3 4 |
| S     | 7  | I wish I could escape from this situation                          | 0 | 1 | 2 | 3 4 |
| S     | 8  | My social life has suffered                                        | 0 | 1 | 2 | 3 4 |
| S     | 9  | I feel emotionally drained, due to caring for my care receiver.    | 0 | 1 | 2 | 3 4 |
| S     | 10 | I expected that things would be different at this point in my life | 0 | 1 | 2 | 3 4 |
| F     | 11 | I'm not getting enough sleep                                       | 0 | 1 | 2 | 3 4 |
| F     | 12 | My health has suffered                                             | 0 | 1 | 2 | 3 4 |
| F     | 13 | Caregiving has made me physically ill                              | 0 | 1 | 2 | 3 4 |
| F     | 14 | I'm physically tired                                               | 0 | 1 | 2 | 3 4 |
| D     | 15 | I don't get along with other family members as well as I used to   | 0 | 1 | 2 | 3 4 |
| D     | 16 | My caregiving efforts aren't appreciated by others in my family    | 0 | 1 | 2 | 3 4 |
| D     | 17 | I've had problems with my marriage                                 | 0 | 1 | 2 | 3 4 |
| D     | 18 | I don't do as good a job at work as I used to                      | 0 | 1 | 2 | 3 4 |
| D     | 19 | I feel resentful of other relatives who could but do not help      | 0 | 1 | 2 | 3 4 |
| E     | 20 | I feel embarrassed by my care receiver's behavior                  | 0 | 1 | 2 | 3 4 |
| E     | 21 | I feel ashamed of my care receiver                                 | 0 | 1 | 2 | 3 4 |
| E     | 22 | I resent my care receiver                                          | 0 | 1 | 2 | 3 4 |
| E     | 23 | I feel uncomfortable when I have friends over                      | 0 | 1 | 2 | 3 4 |
| E     | 24 | I feel angry about my reactions toward my care receiver            | 0 | 1 | 2 | 3 4 |

**Total Score** \_\_\_\_\_

Patient code \_\_\_\_\_

Date \_\_\_\_\_

### Health Questionnaire (EQ-5D-3L)

© 1990 EuroQol Research Foundation. EQ-5D™ is a trade mark of the EuroQol Research Foundation. UK (English) v2.1

Under each heading, please tick the ONE box that best describes your health TODAY.

|                                                                                     |                          |
|-------------------------------------------------------------------------------------|--------------------------|
| <b>MOBILITY</b>                                                                     |                          |
| I have no problems in walking about                                                 | <input type="checkbox"/> |
| I have some problems in walking about                                               | <input type="checkbox"/> |
| I am confined to bed                                                                | <input type="checkbox"/> |
| <b>SELF-CARE</b>                                                                    |                          |
| I have no problems with self-care                                                   | <input type="checkbox"/> |
| I have some problems washing or dressing myself                                     | <input type="checkbox"/> |
| I am unable to wash or dress myself                                                 | <input type="checkbox"/> |
| <b>USUAL ACTIVITIES</b> (e.g. work, study, housework, family or leisure activities) |                          |
|                                                                                     | <input type="checkbox"/> |
|                                                                                     | <input type="checkbox"/> |
| I have no problems with performing my usual activities.                             | <input type="checkbox"/> |
| I have some problems with performing my usual activities                            |                          |
| I am unable to perform my usual activities                                          |                          |
| <b>PAIN/ DISCOMFORT</b>                                                             |                          |
| I have no pain or discomfort                                                        | <input type="checkbox"/> |
| I have moderate pain or discomfort                                                  | <input type="checkbox"/> |
| I have extreme pain or discomfort.                                                  | <input type="checkbox"/> |
| <b>ANXIETY/ DEPRESSION</b>                                                          |                          |
| I am not anxious or depressed                                                       | <input type="checkbox"/> |
| I am moderately anxious or depressed.                                               | <input type="checkbox"/> |
| I am extremely anxious or depressed.                                                | <input type="checkbox"/> |

The best health  
you can imagine

We would like to know how good or bad your health is TODAY.

- This scale is numbered from 0 to 100.
- 100 means the best health you can imagine.  
0 means the worst health you can imagine.
- Please mark an X on the scale to indicate how your health is TODAY.
- Now, write the number you marked on the scale in the box below.

YOUR HEALTH TODAY =



The worst health  
you can imagine



## DASS – 21

Lovibond, S.H. & Lovibond, P.F. (1995). Manual for the Depression Anxiety & Stress Scales.  
(2nd Ed.) Sydney: Psychology Foundation

Please read each statement and circle a number 0, 1, 2 or 3 which indicates how much the statement applied to you over the past week. There are no right or wrong answers. Do not spend too much time on any statement.

The rating scale is as follows:

| 0                          | 1                                                 | 2                                                             | 3                                           |
|----------------------------|---------------------------------------------------|---------------------------------------------------------------|---------------------------------------------|
| Did not apply to me at all | Applied to me to some degree, or some of the time | Applied to me to a considerable degree or a good part of time | Applied to me very much or most of the time |

|    |                                                                                                                                     |   |   |   |   |
|----|-------------------------------------------------------------------------------------------------------------------------------------|---|---|---|---|
| 1  | I found it hard to wind down                                                                                                        | 0 | 1 | 2 | 3 |
| 2  | I was aware of dryness of my mouth                                                                                                  | 0 | 1 | 2 | 3 |
| 3  | I couldn't seem to experience any positive feeling at all                                                                           | 0 | 1 | 2 | 3 |
| 4  | I experienced breathing difficulty (e.g. excessively rapid breathing, breathlessness in the absence of physical exertion)           | 0 | 1 | 2 | 3 |
| 5  | I found it difficult to work up the initiative to do things                                                                         | 0 | 1 | 2 | 3 |
| 6  | I tended to over-react to situations                                                                                                | 0 | 1 | 2 | 3 |
| 7  | I experienced trembling (e.g. in the hands)                                                                                         | 0 | 1 | 2 | 3 |
| 8  | I felt that I was using a lot of nervous energy                                                                                     | 0 | 1 | 2 | 3 |
| 9  | I was worried about situations in which I might panic and make a fool of myself                                                     | 0 | 1 | 2 | 3 |
| 10 | I felt that I had nothing to look forward to                                                                                        | 0 | 1 | 2 | 3 |
| 11 | I found myself getting agitated                                                                                                     | 0 | 1 | 2 | 3 |
| 12 | I found it difficult to relax                                                                                                       | 0 | 1 | 2 | 3 |
| 13 | I felt down-hearted and blue                                                                                                        | 0 | 1 | 2 | 3 |
| 14 | I was intolerant of anything that kept me from getting on with what I was doing                                                     | 0 | 1 | 2 | 3 |
| 15 | I felt I was close to panic                                                                                                         | 0 | 1 | 2 | 3 |
| 16 | I was unable to become enthusiastic about anything                                                                                  | 0 | 1 | 2 | 3 |
| 17 | I felt I wasn't worth much as a person                                                                                              | 0 | 1 | 2 | 3 |
| 18 | I felt that I was rather touchy                                                                                                     | 0 | 1 | 2 | 3 |
| 19 | I was aware of the action of my heart in the absence of physical exertion (e.g. sense of heart rate increase, heart missing a beat) | 0 | 1 | 2 | 3 |
| 20 | I felt scared without any good reason                                                                                               | 0 | 1 | 2 | 3 |
| 21 | I felt that life was meaningless                                                                                                    | 0 | 1 | 2 | 3 |

### CAREGIVER BURDEN INVENTORY (CBI)

Novak, M., & Guest, C. (1989). Application of a multidimensional caregiver burden inventory.  
*The gerontologist*, 29(6), 798-803

The questions refer to you providing care for your relative who is suffering from illness;  
Choose the number that best represents how often the statement describes your feelings.

0 = not at all      1 = a little      2 = moderately      3 = much      4 = very much

| Items |    |                                                                    | Score |   |   |   |   |
|-------|----|--------------------------------------------------------------------|-------|---|---|---|---|
| T     | 1  | My care receiver needs my help to perform many daily tasks.        | 0     | 1 | 2 | 3 | 4 |
| T     | 2  | My care receiver is dependent on me                                | 0     | 1 | 2 | 3 | 4 |
| T     | 3  | I have to watch my care receiver constantly                        | 0     | 1 | 2 | 3 | 4 |
| T     | 4  | I have to help my care receiver with many basic functions          | 0     | 1 | 2 | 3 | 4 |
| T     | 5  | I don't have a minute's break from my caregiving chores            | 0     | 1 | 2 | 3 | 4 |
| S     | 6  | I feel that I'm missing out on life.                               | 0     | 1 | 2 | 3 | 4 |
| S     | 7  | I wish I could escape from this situation                          | 0     | 1 | 2 | 3 | 4 |
| S     | 8  | My social life has suffered                                        | 0     | 1 | 2 | 3 | 4 |
| S     | 9  | I feel emotionally drained, due to caring for my care receiver.    | 0     | 1 | 2 | 3 | 4 |
| S     | 10 | I expected that things would be different at this point in my life | 0     | 1 | 2 | 3 | 4 |
| F     | 11 | I'm not getting enough sleep                                       | 0     | 1 | 2 | 3 | 4 |
| F     | 12 | My health has suffered                                             | 0     | 1 | 2 | 3 | 4 |
| F     | 13 | Caregiving has made me physically ill                              | 0     | 1 | 2 | 3 | 4 |
| F     | 14 | I'm physically tired                                               | 0     | 1 | 2 | 3 | 4 |
| D     | 15 | I don't get along with other family members as well as I used to   | 0     | 1 | 2 | 3 | 4 |
| D     | 16 | My caregiving efforts aren't appreciated by others in my family    | 0     | 1 | 2 | 3 | 4 |
| D     | 17 | I've had problems with my marriage                                 | 0     | 1 | 2 | 3 | 4 |
| D     | 18 | I don't do as good a job at work as I used to                      | 0     | 1 | 2 | 3 | 4 |
| D     | 19 | I feel resentful of other relatives who could but do not help      | 0     | 1 | 2 | 3 | 4 |
| E     | 20 | I feel embarrassed by my care receiver's behavior                  | 0     | 1 | 2 | 3 | 4 |
| E     | 21 | I feel ashamed of my care receiver                                 | 0     | 1 | 2 | 3 | 4 |
| E     | 22 | I resent my care receiver                                          | 0     | 1 | 2 | 3 | 4 |
| E     | 23 | I feel uncomfortable when I have friends over                      | 0     | 1 | 2 | 3 | 4 |
| E     | 24 | I feel angry about my reactions toward my care receive             | 0     | 1 | 2 | 3 | 4 |

**Total Score** \_\_\_\_\_

Patient code \_\_\_\_\_

Date \_\_\_\_\_

### Health Questionnaire (EQ-5D-3L)

© 1990 EuroQol Research Foundation. EQ-5D™ is a trade mark of the EuroQol Research Foundation. UK (English) v2.1

Under each heading, please tick the ONE box that best describes your health TODAY.

|                                                                                     |                          |
|-------------------------------------------------------------------------------------|--------------------------|
| <b>MOBILITY</b>                                                                     |                          |
| I have no problems in walking about                                                 | <input type="checkbox"/> |
| I have some problems in walking about                                               | <input type="checkbox"/> |
| I am confined to bed                                                                | <input type="checkbox"/> |
| <b>SELF-CARE</b>                                                                    |                          |
| I have no problems with self-care                                                   | <input type="checkbox"/> |
| I have some problems washing or dressing myself                                     | <input type="checkbox"/> |
| I am unable to wash or dress myself                                                 | <input type="checkbox"/> |
| <b>USUAL ACTIVITIES</b> (e.g. work, study, housework, family or leisure activities) |                          |
|                                                                                     | <input type="checkbox"/> |
|                                                                                     | <input type="checkbox"/> |
| I have no problems with performing my usual activities.                             | <input type="checkbox"/> |
| I have some problems with performing my usual activities                            |                          |
| I am unable to perform my usual activities                                          |                          |
| <b>PAIN/ DISCOMFORT</b>                                                             |                          |
| I have no pain or discomfort                                                        | <input type="checkbox"/> |
| I have moderate pain or discomfort                                                  | <input type="checkbox"/> |
| I have extreme pain or discomfort.                                                  | <input type="checkbox"/> |
| <b>ANXIETY/ DEPRESSION</b>                                                          |                          |
| I am not anxious or depressed                                                       | <input type="checkbox"/> |
| I am moderately anxious or depressed.                                               | <input type="checkbox"/> |
| I am extremely anxious or depressed.                                                | <input type="checkbox"/> |

The best health  
you can imagine

We would like to know how good or bad your health is TODAY.

- This scale is numbered from 0 to 100.
- 100 means the best health you can imagine.  
0 means the worst health you can imagine.
- Please mark an X on the scale to indicate how your health is TODAY.
- Now, write the number you marked on the scale in the box below.

YOUR HEALTH TODAY =



The worst health  
you can imagine

## DASS – 21

Lovibond, S.H. & Lovibond, P.F. (1995). Manual for the Depression Anxiety & Stress Scales.  
(2nd Ed.)Sydney: Psychology Foundation

Please read each statement and circle a number 0, 1, 2 or 3 which indicates how much the statement applied to you over the past week. There are no right or wrong answers. Do not spend too much time on any statement.

The rating scale is as follows:

| 0                          | 1                                                 | 2                                                             | 3                                           |
|----------------------------|---------------------------------------------------|---------------------------------------------------------------|---------------------------------------------|
| Did not apply to me at all | Applied to me to some degree, or some of the time | Applied to me to a considerable degree or a good part of time | Applied to me very much or most of the time |

|    |                                                                                                                                     |   |   |   |   |
|----|-------------------------------------------------------------------------------------------------------------------------------------|---|---|---|---|
| 1  | I found it hard to wind down                                                                                                        | 0 | 1 | 2 | 3 |
| 2  | I was aware of dryness of my mouth                                                                                                  | 0 | 1 | 2 | 3 |
| 3  | I couldn't seem to experience any positive feeling at all                                                                           | 0 | 1 | 2 | 3 |
| 4  | I experienced breathing difficulty (e.g. excessively rapid breathing, breathlessness in the absence of physical exertion)           | 0 | 1 | 2 | 3 |
| 5  | I found it difficult to work up the initiative to do things                                                                         | 0 | 1 | 2 | 3 |
| 6  | I tended to over-react to situations                                                                                                | 0 | 1 | 2 | 3 |
| 7  | I experienced trembling (e.g. in the hands)                                                                                         | 0 | 1 | 2 | 3 |
| 8  | I felt that I was using a lot of nervous energy                                                                                     | 0 | 1 | 2 | 3 |
| 9  | I was worried about situations in which I might panic and make a fool of myself                                                     | 0 | 1 | 2 | 3 |
| 10 | I felt that I had nothing to look forward to                                                                                        | 0 | 1 | 2 | 3 |
| 11 | I found myself getting agitated                                                                                                     | 0 | 1 | 2 | 3 |
| 12 | I found it difficult to relax                                                                                                       | 0 | 1 | 2 | 3 |
| 13 | I felt down-hearted and blue                                                                                                        | 0 | 1 | 2 | 3 |
| 14 | I was intolerant of anything that kept me from getting on with what I was doing                                                     | 0 | 1 | 2 | 3 |
| 15 | I felt I was close to panic                                                                                                         | 0 | 1 | 2 | 3 |
| 16 | I was unable to become enthusiastic about anything                                                                                  | 0 | 1 | 2 | 3 |
| 17 | I felt I wasn't worth much as a person                                                                                              | 0 | 1 | 2 | 3 |
| 18 | I felt that I was rather touchy                                                                                                     | 0 | 1 | 2 | 3 |
| 19 | I was aware of the action of my heart in the absence of physical exertion (e.g. sense of heart rate increase, heart missing a beat) | 0 | 1 | 2 | 3 |
| 20 | I felt scared without any good reason                                                                                               | 0 | 1 | 2 | 3 |
| 21 | I felt that life was meaningless                                                                                                    | 0 | 1 | 2 | 3 |

### ButterfLife Home device evaluation questionnaire

**1. Was the purpose of the study and the use of the device easy to understand?**

- ☐ Yes
- ☐ Quite
- ☐ No

**2. Was the device easy to use?**

- ☐ Yes
- ☐ Quite
- ☐ No

**3. Did you have difficulty using the device due to its characteristics (shape, weight, etc.)?**

- ☐ Yes
- ☐ Sometimes
- ☐ No

**4. Did you have difficulty using the device due to your health condition?**

- ☐ Yes
- ☐ Sometimes
- ☐ No

**5. Did you find the device was a useful system for monitoring your health condition?**

- ☐ Yes
- ☐ Quite
- ☐ No

**6. Did you find the device was a useful system for interacting with health care professionals?**

- ☐ Yes
- ☐ Quite
- ☐ No

**7. Would you like to continue using it in the future to monitor your physiological parameters?**

- ☐ Yes
- ☐ No
- ☐ I don't know

**CAREGIVER BURDEN INVENTORY (CBI)**

Novak, M., & Guest, C. (1989). Application of a multidimensional caregiver burden inventory.  
*The gerontologist*, 29(6), 798-803

The questions refer to you providing care for your relative who is suffering from illness;  
Choose the number that best represents how often the statement describes your feelings.

0 = not at all      1 = a little      2 = moderately      3 = much      4 = very much

| Items |    |                                                                    | Score |   |   |   |   |  |
|-------|----|--------------------------------------------------------------------|-------|---|---|---|---|--|
| T     | 1  | My care receiver needs my help to perform many daily tasks.        | 0     | 1 | 2 | 3 | 4 |  |
| T     | 2  | My care receiver is dependent on me                                | 0     | 1 | 2 | 3 | 4 |  |
| T     | 3  | I have to watch my care receiver constantly                        | 0     | 1 | 2 | 3 | 4 |  |
| T     | 4  | I have to help my care receiver with many basic functions          | 0     | 1 | 2 | 3 | 4 |  |
| T     | 5  | I don't have a minute's break from my caregiving chores            | 0     | 1 | 2 | 3 | 4 |  |
| S     | 6  | I feel that I'm missing out on life.                               | 0     | 1 | 2 | 3 | 4 |  |
| S     | 7  | I wish I could escape from this situation                          | 0     | 1 | 2 | 3 | 4 |  |
| S     | 8  | My social life has suffered                                        | 0     | 1 | 2 | 3 | 4 |  |
| S     | 9  | I feel emotionally drained, due to caring for my care receiver.    | 0     | 1 | 2 | 3 | 4 |  |
| S     | 10 | I expected that things would be different at this point in my life | 0     | 1 | 2 | 3 | 4 |  |
| F     | 11 | I'm not getting enough sleep                                       | 0     | 1 | 2 | 3 | 4 |  |
| F     | 12 | My health has suffered                                             | 0     | 1 | 2 | 3 | 4 |  |
| F     | 13 | Caregiving has made me physically ill                              | 0     | 1 | 2 | 3 | 4 |  |
| F     | 14 | I'm physically tired                                               | 0     | 1 | 2 | 3 | 4 |  |
| D     | 15 | I don't get along with other family members as well as I used to   | 0     | 1 | 2 | 3 | 4 |  |
| D     | 16 | My caregiving efforts aren't appreciated by others in my family    | 0     | 1 | 2 | 3 | 4 |  |
| D     | 17 | I've had problems with my marriage                                 | 0     | 1 | 2 | 3 | 4 |  |
| D     | 18 | I don't do as good a job at work as I used to                      | 0     | 1 | 2 | 3 | 4 |  |
| D     | 19 | I feel resentful of other relatives who could but do not help      | 0     | 1 | 2 | 3 | 4 |  |
| E     | 20 | I feel embarrassed by my care receiver's behavior                  | 0     | 1 | 2 | 3 | 4 |  |
| E     | 21 | I feel ashamed of my care receiver                                 | 0     | 1 | 2 | 3 | 4 |  |
| E     | 22 | I resent my care receiver                                          | 0     | 1 | 2 | 3 | 4 |  |
| E     | 23 | I feel uncomfortable when I have friends over                      | 0     | 1 | 2 | 3 | 4 |  |
| E     | 24 | I feel angry about my reactions toward my care receive             | 0     | 1 | 2 | 3 | 4 |  |

**Total Score** \_\_\_\_\_

## FAMCARE-2

(Neko, C. FAMCARE and FAMCARE-2 Guidelines.)

Think about the care your family member has received on our Palliative Care unit. Please answer the questions below indicating how satisfied you are with the care received: very satisfied (VS), satisfied (S), undecided (U), dissatisfied (D), very dissatisfied (VD). Please circle the letters below that best match your experience. We specify that by "Palliative Care Team," a term you will find repeated in the questionnaire, we mean the ANT team that is caring for your Family Member at home.

How satisfied are you with:

|                                                                                                              |    |   |   |   |    |
|--------------------------------------------------------------------------------------------------------------|----|---|---|---|----|
| The patient's comfort                                                                                        | VS | S | U | D | VD |
| The way in which the patient's condition and likely progress have been explained by the palliative care team | VS | S | U | D | VD |
| Information given about the side effects of treatment                                                        | VS | S | U | D | VD |
| The way in which the palliative care team respects the patient's dignity                                     | VS | S | U | D | VD |
| Meetings with the palliative care team to discuss the patient's condition and plan of care                   | VS | S | U | D | VD |
| Speed with which symptoms are treated                                                                        | VS | S | U | D | VD |
| Palliative care team's attention to the patient's description of symptoms .                                  | VS | S | U | D | VD |
| The way in which the patient's physical needs for comfort are met                                            | VS | S | U | D | VD |
| Availability of the palliative care team to the family                                                       | VS | S | U | D | VD |
| Emotional support provided to family members by the palliative care team                                     | VS | S | U | D | VD |
| The practical assistance provided by the palliative care team (e.g. bathing, home care, respite)             | VS | S | U | D | VD |
| The Doctor's attention to the patient's symptoms                                                             | VS | S | U | D | VD |
| The way the family is included in treatment and care decisions                                               | VS | S | U | D | VD |
| Information given about how to manage the patient's symptoms (e.g. pain, constipation)                       | VS | S | U | D | VD |
| How effectively the palliative care team manages the patient's symptoms                                      | VS | S | U | D | VD |
| The palliative care team's response to changes in the patient's care needs                                   | VS | S | U | D | VD |
| Emotional support provided to the patient by the palliative care team                                        | VS | S | U | D | VD |



Date \_\_\_\_/\_\_\_\_/\_\_\_\_

1. Gender ☐ Male ☐ Female

2. Age \_\_\_\_\_

3. Occupation

- ☐ Doctor  
☐ Nurse  
☐ Psychologist  
☐ Other \_\_\_\_\_

4. Informatics knowledge

- ☐ Poor  
☐ Good  
☐ Excellent

5. Did you read the user's guide before you started configuring the device?

- ☐ Yes  
☐ No

6. Did you read the user's guide before you started using the device?

- ☐ Yes  
☐ No

| Interface assessment                               | Answer                                                                                                              |   |   |   |   |
|----------------------------------------------------|---------------------------------------------------------------------------------------------------------------------|---|---|---|---|
|                                                    | 0 equals "I did not understand how to do it"<br>and 4 equals "I succeeded in the operation<br>without any problems" |   |   |   |   |
| Ease of set-up                                     | 0                                                                                                                   | 1 | 2 | 3 | 4 |
| Understanding of device features                   | 0                                                                                                                   | 1 | 2 | 3 | 4 |
| Ease of understanding instructions                 | 0                                                                                                                   | 1 | 2 | 3 | 4 |
| Was I able to use the device without any problems? | 0                                                                                                                   | 1 | 2 | 3 | 4 |
| Understanding device labeling                      | 0                                                                                                                   | 1 | 2 | 3 | 4 |
| Understanding of errors that may have shown up     | 0                                                                                                                   | 1 | 2 | 3 | 4 |

**Free notes and ideas for improvement**

---

---

---

---

---
