# Supplementary material for: Distance Monitoring of Advanced Cancer Patients with Impaired Cardiac and Respiratory Function Assisted at Home: A Study Protocol in Italy
Source: MDPI journal article supplement (doi:10.3390/jcm12051922), 2023-02-28
Supplement: s1 [file s1]

## Report 02-01-2023 12:44

The values measured by ButterfLife are processed by VST FIVE software, a certified IIa medical device with certified number 0068/QPZ-DM/184-2020 issued by notified organization number 0068

User ID: F A

| Age | Gender | Hypertensive | Weight (Kg) | Height (cm) | BMI   |
|-----|--------|--------------|-------------|-------------|-------|
| 44  | F      | NO           | 60          | 169         | 21.01 |

### Average values measured during the test

| Systolic BP | Diastolic BP | Heart Rate | Oxygenation | Breath Frequency | Body T. | Ambient T. |
|-------------|--------------|------------|-------------|------------------|---------|------------|
| [mmHg]      | [mmHg]       | [bpm]      | [%]         | [resp/min]       | [°C]    | [°C]       |
| (100-140)   | (60-90)      | (60-100)   | (95-100)    | (10-20)          | -       | -          |
| 126         | 71           | 76         | 99          | 9 *              | 36.9    | 21.3       |

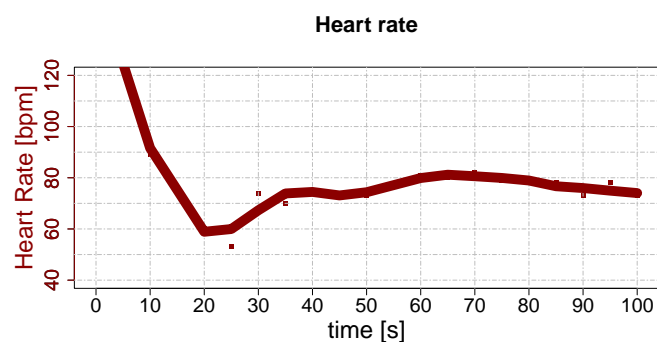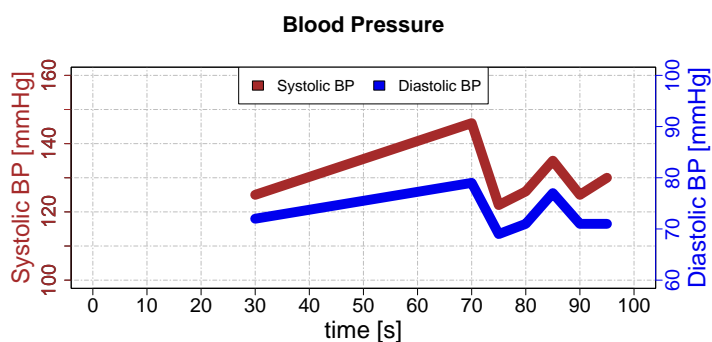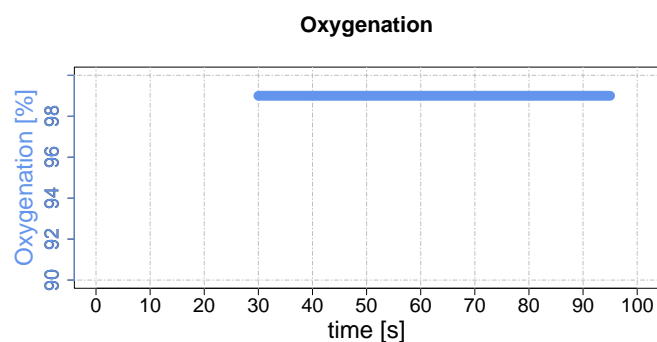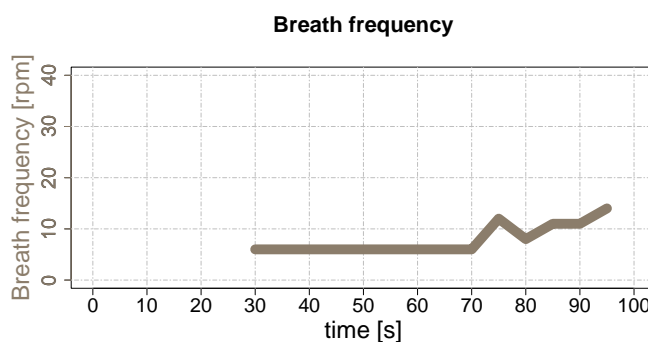

Report created by ButterfLife: 10D07A1DEEF4
